# Supplementary material for: Luciferase activity under direct ligand-dependent control of a muscarinic acetylcholine receptor
Source: PubMed Central journal article supplement (PMC2689208; doi:10.1186/1472-6750-9-46), 2009-05-18
Supplement: 1472-6750-9-46-S1.pdf [file 1472-6750-9-46-S1.pdf]

## Control experiments

For control purposes several receptor-enzyme fusion proteins were generated.

Integration of luciferase into the ILC2 (construct #21 in Figure 2) led to a complete loss of receptor cell surface expression and signal transduction abilities (Table 1).

Further, luciferase was linked to M<sub>3</sub>R construct truncated in the ICL3 (construct #22 in Figure 2). Although, the constructs displayed considerable luciferase activities,

CCh and atropine had no effect on enzyme activity (Table 1). As an additional

control, we introduced the luciferase into the ICL3 of the V<sub>2</sub> vasopressin receptor

(V<sub>2</sub>R). As indicated by a significant increase in cAMP levels following vasopressin

(AVP) application [see Additional file 3], V<sub>2</sub>R-luci is functionally expressed at the

cell surface (one third of wild type E<sub>max</sub> value). All M<sub>3</sub>R ligands had no effect on

enzyme activity when COS-7 cells were transfected with luciferase and V<sub>2</sub>R-luci [see

Additional file 4].
